# Supplementary material for: International Trends in Liver Cancer Incidence Rates
Source: Oxford University Press journal article supplement (doi:10.1158/1055-9965.epi-11-0643), 2011-11-01
Supplement: 10559965epi110643-sup-epi_11-0643_tab_1_xls_24k.xls [file 10559965epi110643-sup-epi_11-0643_tab_1_xls_24k.xls]

## Sheet: Sheet1
Supplemental Table 1. Trends in Liver Cancer Incidence Rates for Select Registries, 1988-2002, Cancer Incidence in Five Continents
	Joinpoint analyses (1988-2002)
	Trend 1			Trend 2			Trend 3
	Years	APC		Years	APC		Years	APC
North America
United States (SEER 9)
Males	1988-1999	4.7*		1999-2002	-0.8
Females	1988-2002	3.7*
Canada
Males	1988-2002	3.7*
Females	1988-2002	2.0*
South America
Brazil, Goiania
Males	1988-2002	-0.46
Females	1988-2002	-7.1*
Columbia, Cali
Males	1988-2002	2.2
Females	1988-2002	1.9
Costa Rica
Males	1988-2002	5.0*
Females	1988-2002	6.0*
Ecuador, Quito
Males	1988-2002	2.3
Females	1988-2002	3.7
Western Europe
Austria, Tyrol
Males	1988-2002	4.9*
Females	1988-2002	1.1
France (8 registries)
Males	1988-2002	2.0*
Females	1988-2002	4.7*
Germany, Saarland
Males	1988-2002	4.8*
Females	1988-2002	3.0*
Italy (6 registries)
Males	1988-1993	6.3*		1993-2002	-0.1
Females	1988-2002	1.5*
Switzerland (2 registries)
Males	1988-2002	0.7
Females	1988-2002	1.7
UK, England (5 registries)
Males	1988-1992	0.8		1992-2002	6.2*
Females	1988-2002	6.9*
	Joinpoint analyses (1988-2002)
	Trend 1			Trend 2			Trend 3
	Years	APC		Years	APC		Years	APC
Northern Europe
Denmark
Males	1988-1997	-0.8		1997-2002	3.9*
Females	1988-2002	-1.0
Estonia
Males	1988-2002	0
Females	1988-2002	1.1
Finland
Males	1988-2002	2.4*
Females	1988-2002	0.1
Latvia
Males	1988-2002	-0.1
Females	1988-2002	0.5
Norway
Males	1988-2002	1.5
Females	1988-2002	-0.29
Sweden
Males	1988-2002	-1.6*
Females	1988-2002	-2.3*
Eastern Europe
Czech Republic
Males	1988-1997	1.8*		1997-2002	-2.2
Females	1988-2002	-0.6
Lithuania
Males	1988-2002	1.6
Females	1988-2002	1.4
Slovakia
Males	1988-2002	-0.6
Females	1988-2002	-0.6
Slovenia
Males	1988-2002	3.7*
Females	1988-2002	-0.1
Poland (2 registries)
Males	1988-2002	-4.5*
Females	1988-2002	-5.7*
Asia
China (2 registries)
Males	1988-2002	-1.3*
Females	1988-2002	-2.1*
India (2 registries)
Males	1988-1992	-2.7		1992-1997	8.6*		1997-2002	-1.5
Females	1988-2002	2.9*
	Joinpoint analyses (1988-2002)
	Trend 1			Trend 2			Trend 3
	Years	APC		Years	APC		Years	APC
Israel: Jews
Males	1988-2002	-1.1
Females	1988-2002	-2
Japan (3 registries)
Males	1988-1996	0.32		1996-2002	-6.3*
Females	1988-1996	1.6*		1996-2000	-1.7		2000-2002	-9.6*
Philippines, Manila
Males	1988-2002	-1.2*
Females	1988-2002	-1.2*
Singapore:Chinese
Males	1988-2002	-0.2
Females	1988-2002	-1.0
Thailand, Chiang Mai
Males	1988-2000	-2.3*		2000-2002	20.1
Females	1988-2000	-5.6*		2000-2002	28.8
Oceania
Australia (5 registries)
Males	1988-1991	9.5*		1991-2002	4.3*
Females	1988-2002	6.3*
New Zealand
Males	1988-2002	2.9*
Females	1988-2002	2.8*
*The APC is statistically different from zero. APC = Annual Percent Change.
